# Supplementary material
Source: PubMed Central journal article supplement (PMC3591845)
Supplement: mmc1.pdf [file mmc1.pdf]

## Supplemental Data

### Mutations in *MED12* Cause X-Linked Ohdo Syndrome

Anneke T. Vulto-van Silfhout, Bert B.A. de Vries, Bregje W.M. van Bon, Alexander Hoischen, Martina Ruiterkamp-Versteeg, Christian Gilissen, Fangjian Gao, Marloes van Zwam, Cornelis L. Harteveld, Anthonie J. van Essen, Ben C.J. Hamel, Tjitske Kleefstra, Michèl A.A.P. Willemsen, Helger G. Yntema, Hans van Bokhoven, Han G. Brunner, Thomas G. Boyer, and Arjan P.M. de Brouwer

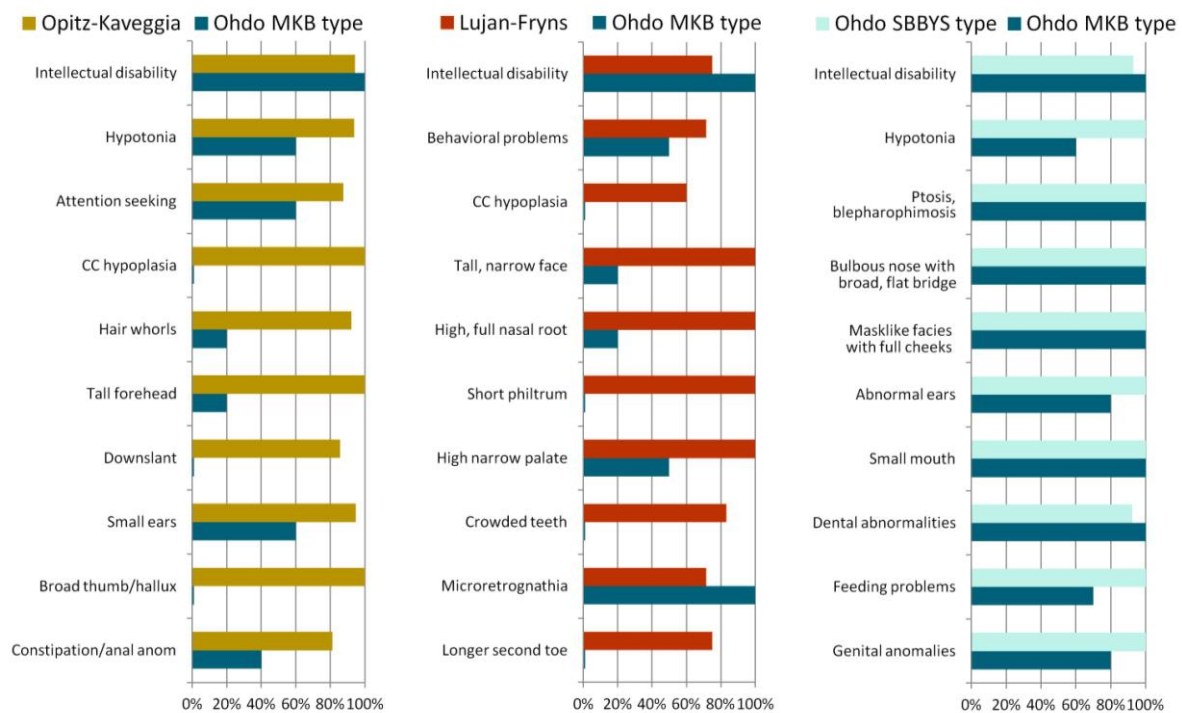

**Figure S1. Phenotype Prevalence Plots**

Phenotype prevalence plots of persons with Ohdo syndrome MKB type (green) for the ten most prevalent features of the other *MED12*-related disorders Opitz-Kaveggia syndrome<sup>1</sup> (yellow) and Lujan-Fryns syndrome<sup>2</sup> (red) and of Ohdo syndrome SBBYS type<sup>3; 4</sup> (blue). Persons with Ohdo syndrome MKB type show largest overlap to Ohdo syndrome SBBYS type.

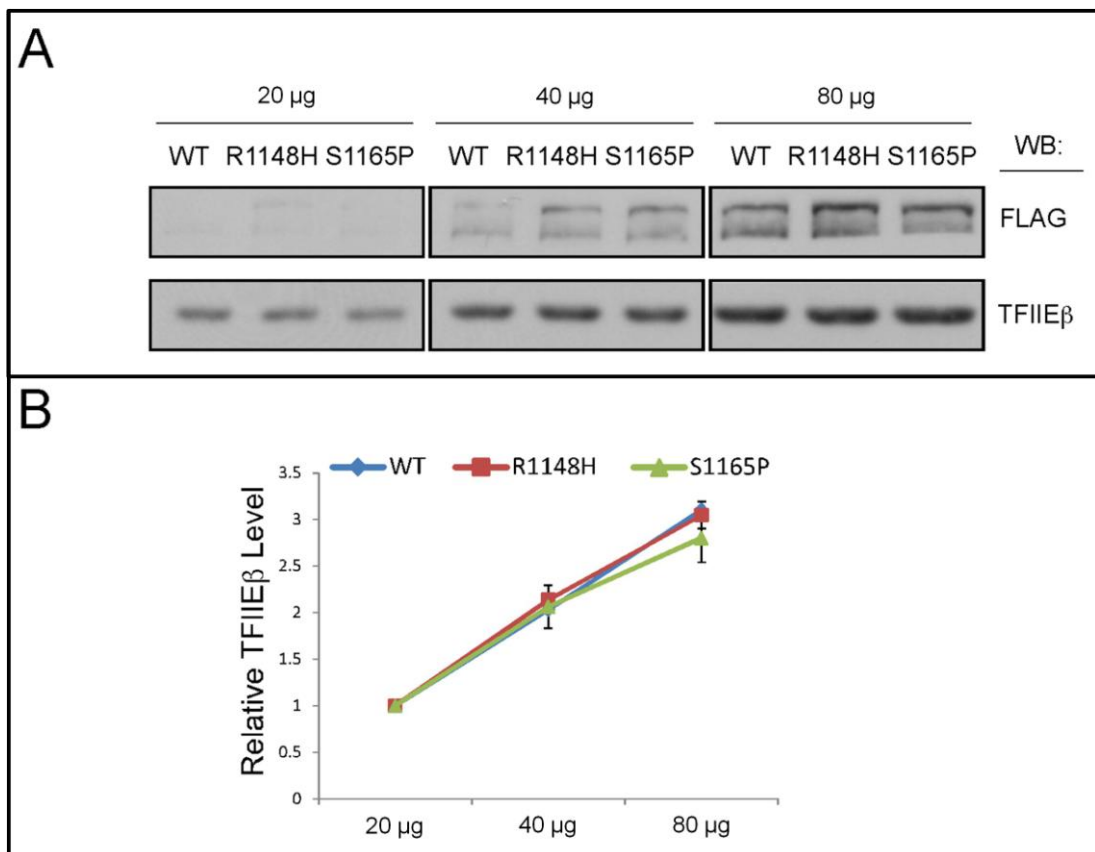

**Figure S2. Quantification of Relative TFIIIE $\beta$  Protein Expression Levels in Serially Diluted Nuclear Extracts from Four Independent Transient Expression Experiments**

(A) Representative western blot (WB) of nuclear extracts from HEK293 cells transiently expressing FLAG-MED12 WT or its Ohdo syndrome mutant derivatives p.(Arg1148His) (R1148H) and p.(Ser1165Pro) (S1165P). MED12 was detected using antibodies specific for the FLAG epitope on FLAG-MED12 derivatives and TFIIIE $\beta$  by antibodies directly directed against this protein.

(B) TFIIIE $\beta$  levels were quantified using ImageQuant TL software and expressed relative to the level of TFIIIE $\beta$  in 20  $\mu$ g nuclear extract. Values represent the average  $\pm$  SEM of the four independent transient expression experiments. The linear range of TFIIIE $\beta$  immunoblot signals occurs between 20 and 80  $\mu$ g of nuclear extracts. To derive relative FLAG-MED12 WT and mutant protein levels shown in Figure 2, WB signals for FLAG-MED12 derivatives were quantified in 40  $\mu$ g of nuclear extracts.

**Table S1. Detailed Phenotype Description of Persons with Ohdo Syndrome MKB Type and Mutations in *MED12***

|                     | Family Individual<br>Mutation (NM_005120.2)<br>Protein change (NP_005111.2)<br>Inheritance pattern                                                                                                                                                                                                                                                                                                                                                             | 1<br>III:1<br>c.3443G>A<br>p.(Arg1148His)<br>maternal                                                                                                 | II:3                                                                                                                                                | 2<br>II:1<br>c.3493T>C<br>p.(Ser1165Pro)<br>maternal                                                                                                                                         | II:2                                                                                                                          | 3<br>II:1<br>c.5185C>A<br>p.(His1729Asn)<br>de novo                                                                                                               |
|---------------------|----------------------------------------------------------------------------------------------------------------------------------------------------------------------------------------------------------------------------------------------------------------------------------------------------------------------------------------------------------------------------------------------------------------------------------------------------------------|-------------------------------------------------------------------------------------------------------------------------------------------------------|-----------------------------------------------------------------------------------------------------------------------------------------------------|----------------------------------------------------------------------------------------------------------------------------------------------------------------------------------------------|-------------------------------------------------------------------------------------------------------------------------------|-------------------------------------------------------------------------------------------------------------------------------------------------------------------|
| <b>Age</b>          |                                                                                                                                                                                                                                                                                                                                                                                                                                                                | 4 years                                                                                                                                               | 18 years                                                                                                                                            | 15 years                                                                                                                                                                                     | 13 years                                                                                                                      | 15 years                                                                                                                                                          |
| <b>Growth</b>       | Birth weight<br>Height<br>Weight<br>Head circumference                                                                                                                                                                                                                                                                                                                                                                                                         | -1 SD<br>not short<br>-1.9 SD<br>-0.3 SD                                                                                                              | -1.3 SD<br>0 SD<br>-4.5 SD<br>+0.7 SD                                                                                                               | 0 SD<br>-2 SD<br>0 SD<br>-0.5 SD                                                                                                                                                             | ND<br>-2.5 SD<br>0/+1 SD<br>-1/-2 SD                                                                                          | -3 SD<br>-4.5 SD<br>0 SD<br>-3 SD                                                                                                                                 |
| <b>Craniofacial</b> | High, prominent forehead<br>Hair whorl/frontal hair upsweep<br>Eyebrows<br>Blepharophimosis<br>Ptosis<br>Epicanthus<br>Downslanting palpebral fissures<br>Hypertelorism/telecanthus<br>Ocular abnormalities<br>Broad and flat nasal bridge<br>Bulbous nose<br>Maxillary hypoplasia<br>Small mouth<br>Abnormal palate<br>Dental anomalies<br><br>Micrognathia<br>Abnormal external ears<br>Narrow auditory canals<br>Hearing problems<br>Triangular shaped face | -<br>-<br>sparse<br>+<br>+<br>+<br>-<br>+<br>N<br>+<br>+<br>+<br>+<br>ND<br>ND<br><br>+<br>low-set, protruding,<br>rounded helices<br><br>+<br>+<br>+ | high hairline<br>-<br>sparse<br>+<br>+<br>+<br>-<br>+<br>N<br>+<br>+<br>+<br>+<br>ND<br>irregular, wide-<br>spaced<br><br>+<br>-<br><br>+<br>+<br>+ | -<br>-<br>sparse<br>+<br>+<br>+<br>-<br>-<br>S, Mi, H<br>+<br>+<br>+<br>+<br>-<br>small teeth,<br>supernum tooth<br><br>+<br>small, posteriorly<br>rotated<br><br>-<br>ND<br><br>+<br>-<br>+ | -<br>+<br>sparse<br>+<br>+<br>+<br>-<br>-<br>Mi, H, S<br>+<br>+<br>+<br>+<br>ND<br>small<br><br>+<br>small<br><br>+<br>-<br>+ | +<br>-<br>sparse<br>+<br>+<br>+<br>-<br>-<br>Mi, S<br>+<br>+<br>+<br>+<br>high, narrow<br>+<br><br>+<br>low-set, posteriorly<br>rotated, small<br><br>+<br>+<br>+ |
| <b>Neurological</b> | Intellectual disability<br>Speech abnormalities<br>Hypotonia<br>Behavioural problems<br><br>Seizures<br>Corpus callosum agenesis                                                                                                                                                                                                                                                                                                                               | +<br>no speech<br>+<br>sensitive, hand<br>flapping<br><br>-<br>-                                                                                      | mild<br>no speech<br>-<br>friendly,<br>hyperactive<br><br>+<br>-                                                                                    | moderate<br>little speech<br>+<br>friendly, difficulty<br>with unexpected<br>situations<br><br>-<br>ND                                                                                       | severe<br>little speech<br>+<br>autism,<br>occasional<br>aggressive<br><br>-<br>ND                                            | severe<br>no speech<br>-<br>friendly, rage outbursts<br><br>-<br>-                                                                                                |
| <b>Extremities</b>  | Thumb/great toe abnormalities<br>Syndactyly<br>Abnormal patellae<br>Joint laxity<br>Camptodactyly or contractures<br><br>Short hands/fingers<br>Horizontal palmar creases                                                                                                                                                                                                                                                                                      | -<br>-<br>ND<br>+<br>-<br><br>-<br>-                                                                                                                  | -<br>-<br>ND<br>+<br>+<br><br>short distal<br>phalanges<br>+                                                                                        | long<br>-<br>-<br>+/-<br>-<br><br>long, thin fingers<br>-                                                                                                                                    | -<br>-<br>-<br>+/-<br>-<br><br>-<br>-                                                                                         | short thumbs<br>-<br>ND<br>+<br>ulnar deviated hands,<br>overriding toes<br>-<br>+                                                                                |
|                     | Congenital heart defects                                                                                                                                                                                                                                                                                                                                                                                                                                       | -                                                                                                                                                     | -                                                                                                                                                   | -                                                                                                                                                                                            | -                                                                                                                             | -                                                                                                                                                                 |
| <b>GI</b>           | Feeding problems<br>Anal anomalies<br>Constipation                                                                                                                                                                                                                                                                                                                                                                                                             | +<br>-<br>+                                                                                                                                           | +<br>-<br>-                                                                                                                                         | -<br>-<br>-                                                                                                                                                                                  | +/-<br>-<br>-                                                                                                                 | +<br>-<br>+                                                                                                                                                       |
| <b>GU</b>           | Genital anomalies<br>Renal anomalies                                                                                                                                                                                                                                                                                                                                                                                                                           | -<br>ND                                                                                                                                               | C<br>ND                                                                                                                                             | C, SS<br>ND                                                                                                                                                                                  | C, SP<br>ND                                                                                                                   | SP<br>ND                                                                                                                                                          |
| <b>Other</b>        |                                                                                                                                                                                                                                                                                                                                                                                                                                                                | hip dysplasia,<br>scoliosis, died 4yo<br>of septic shock<br>after appendicitis                                                                        | narrow thorax,<br>severe<br>clinodactyly, mild<br>metaphyseal<br>dysplasia,<br>multiple fractures,<br>died 25 yo of<br>prostate cancer              | inguinal hernia,<br>clinodactyly toes<br>III-V                                                                                                                                               | asthma, long<br>face                                                                                                          | oligohydramnion,<br>hiatus hernia, thin face                                                                                                                      |

C: cryptorchidism, H: hypermetropia, Mi: microcornea/microphthalmus, N: nystagmus, ND: not determined, S: strabism, SP: small penis SS: shawl scrotum, yo: years old

**Table S2. Exome Sequencing Results and Prioritization of Variants of Families 1 and 2**

|                                  | Family 1 | Family 2 | Overlapping Genes |
|----------------------------------|----------|----------|-------------------|
| Total number of variants         | 39175    | 40105    | 9846              |
| Exonic/canonical splice sites    | 16820    | 16655    | 6108              |
| Non synonymous changes           | 8197     | 8118     | 3411              |
| Not present in dbSNP132          | 719      | 744      | 174               |
| Not present in in-house database | 420      | 438      | 54                |
| X chromosomal variants           | 15       | 15       | 4                 |
| Hemizygous (>70% variation)      | 4        | 5        | 1                 |

**Table S3. Variants Remaining after Prioritization in Families 1 and 2**

| Family | Chr         | Position        | Gene Name           | cDNA Change         | Protein Change        |
|--------|-------------|-----------------|---------------------|---------------------|-----------------------|
| 1      | chrX        | 44703940        | <i>DUSP21</i>       | c.562A>G            | p.(Ile188Val)         |
|        | chrX        | 53573686        | <i>HUWE1</i>        | c.10737C>G          | p.(Asn3579Lys)        |
|        | <b>chrX</b> | <b>70348536</b> | <b><i>MED12</i></b> | <b>c.3443G&gt;A</b> | <b>p.(Arg1148His)</b> |
|        | chrX        | 153609403       | <i>EMD</i>          | c.611G>A            | p.(Arg204His)         |
| 2      | <b>chrX</b> | <b>70348981</b> | <b><i>MED12</i></b> | <b>c.3493T&gt;C</b> | <b>p.(Ser1165Pro)</b> |
|        | chrX        | 76891467        | <i>ATRX</i>         | c.4638A>C           | p.(Lys1546Asn)        |
|        | chrX        | 118250601       | <i>KIAA1210</i>     | c.508C>A            | p.(Leu170Ile)         |
|        | chrX        | 125685583       | <i>DCAF12L1</i>     | c.1009G>A           | p.(Asp337Asn)         |
|        | chrX        | 134156452       | <i>FAM127C</i>      | c.38C>T             | p.(Ala13Val)          |

*MED12* mutations are depicted in bold.

## References

1. Clark, R.D., Graham, J.M., Jr., Friez, M.J., Hoo, J.J., Jones, K.L., McKeown, C., Moeschler, J.B., Raymond, F.L., Rogers, R.C., Schwartz, C.E., et al. (2009). FG syndrome, an X-linked multiple congenital anomaly syndrome: the clinical phenotype and an algorithm for diagnostic testing. *Genet Med* 11, 769-775.
2. Schwartz, C.E., Tarpey, P.S., Lubs, H.A., Verloes, A., May, M.M., Risheg, H., Friez, M.J., Futreal, P.A., Edkins, S., Teague, J., et al. (2007). The original Lujan syndrome family has a novel missense mutation (p.N1007S) in the MED12 gene. *J Med Genet* 44, 472-477.
3. Clayton-Smith, J., O'Sullivan, J., Daly, S., Bhaskar, S., Day, R., Anderson, B., Voss, A.K., Thomas, T., Biesecker, L.G., Smith, P., et al. (2011). Whole-exome-sequencing identifies mutations in histone acetyltransferase gene KAT6B in individuals with the Say-Barber-Biesecker variant of Ohdo syndrome. *Am J Hum Genet* 89, 675-681.
4. Day, R., Beckett, B., Donnai, D., Fryer, A., Heidenblad, M., Howard, P., Kerr, B., Mansour, S., Maye, U., McKee, S., et al. (2008). A clinical and genetic study of the Say/Barber/Biesecker/Young-Simpson type of Ohdo syndrome. *Clin Genet* 74, 434-444.
